# Low coverage genomic data resolve the population divergence and gene flow history of an Australian rain forest fig wasp

Lisa Cooper<sup>1#</sup>, Lynsey Bunnefeld<sup>2#</sup>, Jack Hearn<sup>1,3</sup>, James M Cook<sup>4</sup>, Konrad Lohse<sup>1\*</sup>, Graham N. Stone<sup>1\*</sup>.

1. Institute of Evolutionary Biology, University of Edinburgh, EH9 3FL Edinburgh, UK.

2. Biological & Environmental Sciences, University of Stirling FK9 4LA Stirling, UK.

3. Vector Biology Department, Liverpool School of Tropical Medicine, Liverpool, UK.

4. Hawkesbury Institute for the Environment, Hawkesbury Campus, Western Sydney University, Richmond, New South Wales, Australia

Corresponding author: Prof. Graham N. Stone, Institute of Evolutionary Biology, Charlotte Auerbach Road, University of Edinburgh, EH9 3FL Edinburgh, UK.

email: [graham.stone@ed.ac.uk](mailto:graham.stone@ed.ac.uk)

# these authors are joint first authors of the paper

\* these authors contributed equally to this work.

Key words: Demography, phylogeography, Australia, *Ficus*, *Pleistodontes*, Agaonidae.

Running title: Population divergence and gene flow in a fig wasp

Orcid identifiers:

L. Bunnefeld: [0000-0002-9226-7153](https://orcid.org/0000-0002-9226-7153)

J.M. Cook: 0000-0001-8447-6126

J. Hearn: 0000-0003-3358-4949

K. Lohse: 0000-0001-9918-058X

G.N. Stone: 0000-0002-2737-696X

## 28 Abstract

Population divergence and gene flow are key processes in evolution and ecology. Model-based  
 30 analysis of genome-wide datasets allows discrimination between alternative scenarios for these  
 processes even in non-model taxa. We used two complementary approaches (one based on the  
 32 blockwise site frequency spectrum (bSFS), the second on the Pairwise Sequentially Markovian  
 Coalescent (PSMC)) to infer the divergence history of a fig wasp, *Pleistodontes nigriventris*.  
 34 *Pleistodontes nigriventris* and its fig tree mutualist *Ficus watkinsiana* are restricted to rain forest  
 patches along the eastern coast of Australia, and are separated into northern and southern  
 36 populations by two dry forest corridors (the Burdekin and St. Lawrence Gaps). We generated  
 whole genome sequence data for two haploid males per population and used the bSFS approach  
 38 to infer the timing of divergence between northern and southern populations of *P. nigriventris*, and  
 to discriminate between alternative isolation with migration (IM) and instantaneous admixture  
 40 (ADM) models of post divergence gene flow. *Pleistodontes nigriventris* has low genetic diversity ( $\pi$   
 = 0.0008), to our knowledge one of the lowest estimates reported for a sexually reproducing  
 42 arthropod. We find strongest support for an ADM model in which the two populations diverged *ca.*  
 196kya in the late Pleistocene, with almost 25% of northern lineages introduced from the south  
 44 during an admixture event *ca.* 57kya. This divergence history is highly concordant with individual  
 population demographies inferred from each pair of haploid males using PSMC. Our analysis  
 46 illustrates the inferences possible with genome-level data for small population samples of tiny, non-  
 model organisms and adds to a growing body of knowledge on the population structure of  
 48 Australian rain forest taxa.

## 50 Introduction

Division of an ancestral population into daughter populations is a universal and repeating  
 52 process in biology. The tempo and mode of population divergence are central to evolutionary

processes ranging from local adaptation and range expansion to the origin of species (Hey & Nielsen 2004; Martin et al., 2013; Sousa & Hey, 2013). From a demographic perspective, population divergence can be described in terms of the sizes of ancestral and descendant populations, the time at which the ancestral population split, and parameters capturing the timing, extent and direction of gene flow between descendant populations. Gene flow can be modelled in at least two general ways (Fig. 1): an isolation with migration (IM) model identifies gene flow as the result of ongoing dispersal (Nielsen & Wakeley 2001, Hey, & Nielsen 2004, Lohse et al 2011), while an instantaneous admixture (ADM) model associates gene flow with one or more discrete dispersal events in the past (Durand et al., 2011; Sousa & Hey, 2013; Lohse & Frantz, 2014). Thus, which of these models applies may tell us whether putative dispersal barriers are past or ongoing, and help to identify evolutionarily independent conservation units within species. The models also have very different implications for local adaptation: while local adaptation may proceed unimpeded during periods of complete isolation in the ADM model, continuous gene flow under the IM model imposes a constant genetic load of locally deleterious variants (Bisschop et al 2020).

Discriminating among alternative models of gene flow and estimating the relevant demographic parameters is a data-hungry problem and a growing number of approaches exploit the signal contained in whole genome data (WGD) for a small samples of individuals (Li & Durbin, 2011; Lohse & Frantz 2014; Bunnefeld et al., 2018). The falling costs of genome sequencing have made demographic inferences possible for rare and non-model taxa. Here we use two such approaches to infer the population divergence history of *Pleistodontes nigriventris*, a wasp that is the only pollinator of an endemic fig species (*Ficus watkinsiana*) found in two widely separated blocks of rainforest along the east coast of Australia (see below) (Dixon 2003; Lopez-Vaamonde et al., 2002). Our overall objective is to infer the extent and direction of fig wasp gene flow between these two populations, using WGD for just two individuals per population. Our approaches take advantage of the haplodiploidy of the Hymenoptera, by sampling males whose haploid genomes facilitate data analysis and interpretation.

We first compare support for alternative IM and ADM models using a parametric maximum-composite likelihood method (Lohse et al., 2011; 2016), and then compare these results with those obtained using the Pairwise Sequentially Markovian Coalescent (PSMC) (Li & Durbin, 2011), a non-parametric method. We chose these methods because they infer population history based on different aspects of genome-wide sequence variation, and have contrasting limitations. The Lohse et al. (2011) method is based on a blockwise summary of sequence variation, while PSMC exploits the information contained in the density of pairwise differences along a minimal sample of two haploid genomes. The Lohse et al. (2011) method – by design – lacks power to detect very gradual demographic changes (for example, in population size), while PSMC is known to smooth out very sudden changes (Li & Durbin, 2011). The two methods therefore complement each other and together provide a comprehensive picture of population history.

Fig trees are keystone biological resources in tropical and subtropical habitats worldwide (Cook & Rasplus 2003; Harrison 2005), and fig fruits and their insect inhabitants are important model systems in the study of community assembly and coevolution (Cook & Rasplus 2003; Segar et al., 2014). Our target species *Pleistodontes nigriventris* is the specialist pollinating wasp of *Ficus watkinsiana* (Lopez-Vaamonde et al., 2002; Male & Roberts 2005, Rønsted et al., 2008), a rainforest fig restricted to northern and southern populations over 1000km apart along the eastern coast of Australia (Fig. 2) (Dixon 2003). The distribution of Australian rainforests has been dictated by two major processes. First, falling temperatures during the Miocene restricted them to areas of higher rainfall along the eastern and southern coasts (Markgraf et al., 1995), separated from drier inland habitats by the Great Dividing Range (Chapple et al., 2011) (Fig. 2). Second, during the Pleistocene climate oscillations, east coast Australian rain forests repeatedly expanded from, and contracted into, a latitudinal series of refugia separated by intervening areas of dry forest and shrublands (Bryant & Krosch, 2016; Chapple et al., 2011). The rainforest areas occupied by *F. watkinsiana* are currently separated by two major dryland corridors (Fig. 2): the Burdekin Gap, located between Mackay and Townsville, is the largest dry land corridor on the east coast, and the St. Lawrence Gap is a smaller lowland dry corridor located 350km further south (Weber et al., 2014; Bryant & Krosch, 2016). While the formation and stability of these dryland corridors through

time is incompletely characterised (Bryant & Krosch, 2016), both have been implicated in restricting dispersal and driving population divergence in rainforest plants (Burke et al., 2013), including *F. watkinsiana* (Dixon, 2003H; Haine & Cook, 2005) and animals (e.g. Schauble & Moritz, 2001; Pope et al., 2001; Nicholls & Austin, 2005; Brown et al., 2006; Dolman & Moritz, 2006; Baker et al., 2008, MacQueen et al., 2012; Rix & Harvey, 2012; Bryant & Fuller, 2014; Bryant & Krosch, 2016).

The impact of biogeographic barriers on the genetic makeup of any species depends on how long ago population divergence occurred, the sizes of the populations, and the direction, mode and frequency of gene flow between them (Aeschbacher et al., 2017; Ringbauer et al., 2018). Previous studies of fig/fig wasp systems provide evidence for two contrasting paradigms with which patterns in *Pleistodontes nigriventris* can be compared. Female fig wasps are poor active flyers (and the males are wingless and do not leave their natal fig) (Ware & Compton 1994a,b), and we might therefore expect limited dispersal, restricted gene flow and substantial population structure in geographically widespread species. This hypothesis is supported by the observation that some widespread fig species are pollinated by a geographically structured suite of distinct fig wasp taxa (Chen et al., 2012; Wachi et al., 2016; Rodriguez et al., 2017; Yu et al., 2019). This paradigm predicts high genetic divergence between northern and southern populations of *P. nigriventris*. However, some fig wasps are dispersed over large distances by wind currents above the tree canopies (Ahmed et al., 2009; Liu et al., 2015), particularly when emerging from fig fruits high in the forest canopy (Harrison & Rasplus, 2006; Kobmoo et al., 2010; Yang et al., 2015; Liu et al., 2015; Sutton et al., 2016). Two studies of such systems have found little genetic differentiation in pollinating fig wasps over distances ranging from several hundred to >1500 km (Kobmoo et al., 2010; Liu et al., 2015; Bain et al., 2016). *Ficus watkinsiana* can grow to 50m, and if *Pleistodontes nigriventris* benefits from wind-assisted dispersal, we might expect to find significant gene flow between *F. watkinsiana* populations. Here we answer the following questions for *Pleistodontes nigriventris*:

1) Is there evidence of genetic divergence between populations either side of the Burdekin and St. Lawrence Gaps?

- 136 2) Is there a signal of post-divergence gene flow, and if so, in which direction?  
 3) Can we discriminate between the IM and ADM models of gene flow?  
 138 4) Do the blockwise and PSMC methods infer concordant population histories?  
 5) Is the inferred divergence time for *P. nigriventris* concordant with estimates for other co-  
 140 distributed taxa?

## 142 **Materials and Methods**

### **Sample Collection**

144 Samples were collected between January 2001 and August 2009 from four sites in  
 Queensland, two in each of the northern and southern ranges of *F. watkinsiana*. The two Northern  
 146 individuals were sampled from Kairi (N1: 17.21° S, 145.55° E) and Kamerunga (N2: 16.87° S,  
 145.68° E) and the two South individuals were sampled from Settlers Rise (S1: 27.68° S, 153.26°  
 148 E) and Main Range (S2: 28.07° S, 152.41° E) (Fig. 2). Near-to-ripe *F. watkinsiana* fruits were  
 collected and placed individually into specimen pots. Our sampling targeted male fig wasps, whose  
 150 haploid genome facilitates analysis (Bunnefeld et al., 2018; Hearn et al., 2014). Once the wasps  
 started to emerge (12-24 hours after collection depending on fig ripeness) figs were dissected and  
 152 live males were placed directly into 70% ethanol to preserve for DNA extraction. Due to potentially  
 high levels of sib-mating in fig wasps (Greeff et al., 2009; Sutton et al., 2016) all individuals were  
 154 sampled from different figs.

### **DNA extraction and sequenced-based confirmation of identity.**

156 DNA was extracted from whole male wasps 1.5-1.6mm long (Lopez-Vaamonde et al.,  
 2002) using the Qiagen DNeasy Blood and Tissue Extraction kit. The Purification of Total DNA  
 158 from Animal Tissues (Spin-Column) Protocol was followed with the following modifications to  
 maximise DNA yield from these extremely small wasps. Step 1: Individual wasps were placed in  
 160 180 µl of buffer ATL and crushed using a mini-pestle. Step 2: Riboshredder RNase (Epicentre) was  
 used in place of RNase A. Steps 7-8: Buffer EB was used in place of Buffer AE for the elutions as  
 162 Buffer AE contains EDTA, which will interfere with the downstream library preparation. Extractions

were eluted in smaller volumes (25 µl) than recommended and samples were incubated for longer  
 164 (5 minutes). This protocol yielded 35.7-58.3 ng of DNA per wasp, despite their very small size (total  
 body length ca. 1mm).

166 Identification of male fig wasps was confirmed by comparison of sample sequences to  
 voucher sequences for a 433 base pair (bp) fragment of the mitochondrial cytochrome b (cytb)  
 168 gene (Lopez-Vaamonde et al., 2001). Sequences were amplified using the primers CB1/CB2  
 (Jermiin & Crozier, 1994). 0.3 µl of DNA extraction was used per PCR reaction. The remainder of  
 170 the PCR mix consisted of 2 µl BSA (10 mg/ml), 2 µl 10X PCR buffer, 0.8 µl MgCl<sub>2</sub> (50mM), 0.3 µl  
 of each primer (20 µM), 0.16 µl dNTPs (each 25 mM) and 0.1 µl Taq (Bioline 5U/µl), made up to 20  
 172 µl with autoclaved MilliQ water. Amplification was carried out using a Bio-Rad S1000 thermal  
 cycler for 2 minutes at 94°C, 35 cycles of 30 seconds at 94°C, 30 seconds at 48°C, 40 seconds at  
 174 72°C, and a final elongation step of 5 minutes at 72°C. PCR products were visualised on a 2%  
 agarose gel and cleaned using a shrimp alkaline phosphatase and exonuclease 1 protocol. 2.5 µl  
 176 of SAPExo1 mix (1.425 µl SAP dilution buffer, 1 µl SAP (1U), 0.075 µl Exo1 (1.5U)) was added to  
 each sample before being incubated for 40 minutes at 37°C followed by 15 minutes at 94°C. Only  
 178 the forward strand was sequenced for each individual, using BigDye chemistry on an ABI 3730  
 machine at the Edinburgh Genomics facility. Sequences for the four individuals have been  
 180 deposited on GenBank (individual accession numbers: N1 MF597824; N2 MF597800; S1  
 MF597825; S2 MF597826).

## 182 High-throughput library preparation and sequencing

We generated an Illumina Nextera genomic library for each individual male fig wasp  
 184 following the manufacturers' instructions. To make best use of paired end sequencing, the library  
 fragment size distribution should be unimodal with a majority of fragments longer than the 150bp  
 186 read length. We checked the fragment size distribution by running 1µl of each library on a high  
 sensitivity DNA Bioanalyzer chip (Agilent 2100). Libraries for each individual were end-labelled  
 188 using a unique pair of indices, pooled and sequenced in one lane of 150bp paired-end reads on  
 the Illumina HiSeq platform at the Edinburgh Genomics facility. Pooling volumes were calculated to



achieve ~6-fold coverage per individual assuming 50 gigabases of data per lane and a genome size of 300 Mb based on an estimate for another Agaonid fig wasp, *Ceratosolen solmsi* (278 Mb; Xiao et al., 2013). The short read data have been deposited at the ENA short read archive (Cooper et al., 2020a).

## Bioinformatic pipeline

Reads for all four individuals were screened to remove low quality and contaminant reads and combined. After exclusion of contaminants, reads for all four individuals were combined to generate a *de novo* meta-assembly for *P. nigriventris* using *SPAdes* (version 3.6.2) (Bankevich et al., 2012). Reads from each individual were mapped back to this reference using BWA; variants were called using *GATK* haplotype caller. After masking repeat sequences, sites with a minimum coverage of two and a mapping quality (>20) and base quality (>10) were identified using the *GATK* tool *CallableLoci*. The bioinformatic pipeline is summarised diagrammatically in Supplementary information, Figure S1.

(i) *Quality control and processing of sequencing reads*. To exclude low quality sequence, reads were checked using *Fast-QC* ([www.bioinformatics.babraham.ac.uk/projects/fastqc](http://www.bioinformatics.babraham.ac.uk/projects/fastqc)) and trimmed at a base quality score of 20 (sliding window 15:20 and min length 50). Adapters were trimmed using *Trimmomatic* version 0.32 (Bolgar et al., 2014). Any adaptors found to be present after a second pass through *Fast-QC* were removed using *Cutadapt* (Martin, 2011). Paired-end reads were merged using *PEAR* version 0.9.0 (Zhang et al., 2014) for *de novo* assembly only.

(ii) *Filtering of contaminant sequences*. Genomic data obtained from whole organism libraries commonly contain reads from associated non-target organisms, including symbionts, parasites and commensals. *Wolbachia* bacteria are common endosymbionts in fig wasps (Haine and Cook, 2005) and diverse fungal taxa have been identified from a genome assembly of the fig wasp *Ceratosolen solmsi* (Niu et al., 2015). To remove contaminant sequences from our data, we first aligned reads across all 4 individuals to a *Velvet* assembly (version 1.2.10) with a k-mer length of 31 (Zerbino and Birney, 2008). The filtered reads for each individual were mapped to an initial *Velvet* reference assembly using *Bowtie2* version 2.2.3 (Langmead and Salzberg, 2012).



Contaminant sequences were identified using blobtools (Kumar et al., 2013), which uses BLAST searches to create Taxon-Annotated-GC-Coverage plots (Blobplots) that allocate aligned reads to taxa at a user-specified level. We used four BLAST approaches to assess taxonomic matches: (i) The fast protein aligner *Diamond* (version 0.7.9) (Buchfink et al., 2015) was used alongside three BLAST (version 2.2.29) searches: (ii) against the NCBI nucleotide database (<https://www.ncbi.nlm.nih.gov/nucleotide/>), (iii) against the genome of the Agaonid pollinating fig wasp, *Ceratosolen solmsi* (Xiao et al., 2013), and (iv) against the genome of the pteromalid parasitoid wasp *Nasonia vitripennis* (Werren et al., 2010). Non-Arthropod reads (primarily allocated to Proteobacteria and Ascomycota) were excluded from further analysis.

(iii) *Generation of a P. nigriventris reference assembly.* After exclusion of contaminants, reads for all four individuals were combined and re-assembled using *SPAdes* (version 3.6.2) (Bankevich et al., 2012). The quality of this reference assembly was assessed using *BUSCO* (*Benchmarking Universal Single-Copy Orthologs*) version 1.1b1 (Simão et al., 2015) using the Arthropoda *BUSCO* set (<http://busco.ezlab.org>).

(iv) *Variant calling.* Filtered, merged reads from each individual were mapped back to the reference meta-assembly using the *Burrows-Wheeler Aligner (BWA)* version 0.7.10 (Li & Durbin, 2009). FASTA file indexes and sequence dictionaries were created using *samtools* (Li et al., 2009) *faidx* (version 1.2) and the *picard* (<https://broadinstitute.github.io/picard/index.html>) tool *CreateSequenceDictionary* (version 1.141) respectively. The BAM files were sorted and merged to create a single species BAM file using the *picard* tool *MergeSamFiles*. Duplicate reads were removed from these merged files using the *picard* tool *MarkDuplicates*. Variants were called using *HaplotypeCaller* in *GATK*. As male wasps are haploid, ploidy was set to 1 and the '-emit variants only' option was used. Only SNPs were considered.

(v) *Masking repetitive regions.* Regions of repetitive DNA can cause assembly and mapping errors in short read data (Treangen & Salzberg, 2011). We created a library of repetitive regions in the reference meta-assembly using *RepeatScout* (version 1.0.5) (Price et al., 2005), and masked these using *RepeatMasker* (version open-4.0.6) (Smit, AFA, Hubley, R & Green, P. *RepeatMasker*

*Open-4.0*. 2013-2015 <http://www.repeatmasker.org>). *RepeatMasker* outputs an annotation file which was used to create a BED file of repeat positions for downstream processing.

(vi) *VCF filtering*. High quality sites were identified based on coverage and mapping quality using the *GATK* tool *CallableLoci* and default parameter values except for the following: minimum base quality of 10, minimum mapping quality of 20, minimum read depth of two reads per site. The base quality score recalibrated (BQSR) BAM file was subsampled to extract BAM files for each individual. We used *CallableLoci* to generate BED files of callable regions in each individual. Repeat regions were excluded and positions meeting filters across all four individuals extracted using *bedtools multiIntersectBed*. This BED file was used to filter the VCF files (generated from the *GATK* pipeline) for callable variable sites using *bcftools* (Li, 2011) version 1.2.

## Fitting of IM and ADM models

(i) *Specification of alternative IM and ADM divergence models*: Both the IM and the ADM model assume an ancestral population with a constant effective population size ( $N_a$ ) that splits into two populations (North and South). One of the descendant populations maintains the same ancestral population size  $N_a$ , whilst the other is free to change to  $(1/B) \times N_a$  (i.e.  $B$  scales the rate of coalescence in the other population). In both models (Fig. 1), population divergence occurs at time  $T$  in the past. In the IM model divergence is followed by continuous unidirectional migration at rate  $M = 4Nm$  migrants per generation ( $m$  is the per lineage probability of migrating). In the ADM model (Fig. 1), gene flow occurs through an instantaneous and unidirectional admixture event at time  $T_{adm}$  which transfers a fraction  $f$  of lineages from the donor population into the recipient (Fig. 1). All time parameters are scaled in  $2N_a$  generations. We assessed support for all four possible combinations of population size and gene flow under both the IM and ADM models (Figure S2), as well as for simpler nested models which either involving gene flow but a single population size parameter ( $B=1$ ) or two population sizes but no post-divergence gene flow.

(i) *Generation of blockwise site frequency spectra (bSFS)*: We used the composite likelihood calculation described in Lohse et al. (2016) to fit the IM and ADM models (see also Jordan et al., 2017 and Nürnberg et al., 2017). The method uses information in patterns of linked sequence

variation contained in short blocks and has previously been used for demographic inference under a variety of demographic scenarios including the IM model (Lohse et al., 2012) and models of discrete admixture (Bunnefeld et al., 2018). For a sample of four haploid individuals (two from each of the North and South populations), we can distinguish four mutation types: variants in the two Northern samples (Nvar), variants in the two Southern samples (Svar), fixed differences between North and South (Fixed differences), or variants shared between North and South (Sharedvar) (Lohse et al., 2016). The site frequency spectrum of a block (bSFS) consists of counts of these four site types, i.e. vector {Nvar, Svar, Sharedvar, Fixed}. We used the automated recursion implemented by Lohse et al. (2016) to obtain the generating function of genealogies under the ADM model and computed the composite likelihood of both the ADM and IM models in *Mathematica* as described in Lohse et al. (2016) and Nürnberger et al. (2017).

The likelihood calculation assumes an infinite sites mutation model and no within-block recombination. Given these assumptions, blocks that contain both fixed difference and shared variants (violating the 4-gamete test) are not possible and were excluded from the likelihood calculation. We chose a block length that strikes a balance between potential bias (arising from recombination within blocks) and power (which suffers when too few blocks contain multiple variant sites). We used a custom python script to extract aligned sequence blocks of a fixed length of 387 base pairs, which corresponds to an average of 1.5 variant sites per block. The blockwise data were analysed in *Mathematica* (Wolfram Research, Inc., Mathematica, Version 10.4, Champaign, IL (2016)) (Cooper et al., 2020b). The computational cost of calculating composite likelihoods increases with the number of unique bSFS configurations considered in the data. We limited the number of bSFS configurations by lumping mutation counts above a threshold  $k_{\max} = 2$  for the Nvar, Svar and SharedVar and  $k_{\max} = 3$  for fixed differences. Since 87% of the blockwise data are within these  $k_{\max}$  bounds and so included in the composite likelihood calculation exactly, the expected loss of power is minimal.

(iii) *Estimation of demographic parameters*: We estimated all model parameters for both the IM and ADM model. Estimation of  $N_a$  (as  $N_a = \theta / (4 \mu)$ ) and scaling of  $T$  parameters into years requires an estimate of the mutation rate per generation ( $\mu$ ) and the number of fig wasp generations ( $g$ ) per

year. In the absence of any fig wasp estimate of  $\mu$ , we used the per generation mutation rate of  $2.8 \times 10^{-9}$  for *Drosophila melanogaster* (Keightley et al., 2014). Note that the relative timing of events in different models is not affected by this calibration. We assumed four fig wasp generations per year ( $g=4$ ) and converted time estimates into years by multiplying by  $2N_a$  and dividing by  $g$ .

(iv) *Correcting for the effects of linkage between blocks.* The composite likelihood calculations do not account for linkage between blocks. Given the difficulty of assessing the level of linkage between blocks in highly fragmented assemblies, we incorporated linkage effects using a parametric bootstrap approach (Lohse et al., 2016). We used *msprime* (version 0.3.1 (IM) and 0.4.0 (ADM)) (Kelleher et al., 2016) to simulate 100 datasets assuming a recombination rate of  $2.719 \times 10^{-10}$  per base (estimated from the data, see below). Each dataset consisted of 20 continuous stretches of recombining sequence and had a total length matching the real data. Fitting the inferred model to these simulated datasets, we obtained 95% confidence intervals for parameter estimates as  $\pm 1.96$  standard deviations (of the analogous estimates on the simulated data).

(v) *Model selection.* We used an analogous parametric bootstrap scheme to determine whether the IM or ADM models provided a significantly better fit to our data. We fitted both models to each of 100 bootstrap datasets simulated under the best-fit IM model parameters. The distribution of differences in log composite likelihood (calculated as  $\Delta \ln CL = 2 * (ADM \ln CL - IM \ln CL)$ ) between the IM model and the ADM model represents an expectation of selecting the ADM when the IM is true (Type 1 error). We determined critical values from this distribution at a significance level of 0.05.

(vi) *Recombination rate estimation.* There are no estimates of either the per generation recombination rate ( $r$ ) or the population recombination rate ( $\rho = 4Ner$ ) for any fig wasp species. We therefore estimated a recombination rate for *P. nigriventris* using a two-locus generating function that co-estimates  $\rho$  (scaled by  $2N_e$ ) and  $\theta$ , for a sample of two haploid genomes drawn from a single panmictic population (here, the two Northern individuals) (Lohse et al., 2011).

## 324 PSMC analysis

We compared the results of our blockwise analysis with inference using the Pairwise  
 326 Sequentially Markovian Coalescent (PSMC) (Li & Durbin, 2011). PSMC infers the effective  
 population size history of a single diploid individual, and can also be applied to a pair of haploid  
 328 genomes. PSMC provides a continuous estimate of demographic parameters through time. While  
 PSMC does not allow to infer population divergence directly, comparison the PSMC trajectories of  
 330 two diverged populations (here, North and South) reveals when these shared the same population  
 size and so were likely part of the same ancestral population.

332 PSMC uses the density of pairwise differences along the genome to infer a trajectory of  
 population size through time. Input files were generated from the per-individual BAM files using  
 334 *samtools mpileup* (version 0.1.19). The pileup file was converted to a VCF file in *bcftools* (version  
 0.1.19) and a consensus sequence (fastq file) per individual was generated using the *bcftools*  
 336 utility *vcf2fq*. Consensus files contained 31,371 and 33,523 contigs for the North and South pairs  
 respectively. The two consensus files per population were merged using the *seqtk* function  
 338 *mergefa* (version 1.0) and converted to the PSMC input format using the PSMC function *fq2psmcfa*  
 (version 0.6.5). Only contigs that contain >10kb of unfiltered bases,  $\geq 80\%$  of which pass a quality  
 340 threshold score, here set to  $\geq 20$  were included (6,900 and 7,305 contigs for the North and South  
 pairs respectively). We analysed each pair of individuals with PSMC (version 0.6.5) using the  
 342 following parameter values:  $N = 30$ ,  $t = 20$ ,  $r = 10.3$  and  $p = "4+60*1+4"$ . Each dataset was sub-  
 sampled 100 times to generate bootstrap replicates using the PSMC utility *splitfa* (version 0.6.5).  
 344 Results were calibrated using the same mutation rate and generation times given above.

## Results

### 346 De novo genome assembly for *Pleistodontes nigriventris*

Nextera libraries were generated successfully for all four male *Pleistodontes nigriventris*  
 348 (Figure S3). After initial filtering and trimming the joint assembly of reads for all four individuals in

*Velvet* contained 173,180 contigs  $\geq 200$ bp (Table S1). We identified contaminant reads from a range of non-Arthropod taxa (Figure S4). Individual assemblies contained between 5k and 149k reads identified as bacterial. For three individuals over 97% of these were attributed to *Wolbachia* (and 24% in the final individual) (Table S2). The relative fraction of *Wolbachia* reads was significantly higher in Northern compared to Southern individuals (Chi-squared = 95159, df = 1,  $p < 2.2e-16$ ), consistent with previous findings of between-population differences in *Wolbachia* prevalence in *P. nigriventris* (Haine & Cook, 2005). Excluding contaminant reads resulted in between 11 and 22.5 million reads per individual (Table S1). Re-assembly using *SPAdes* improved the contiguity (139,731 contigs  $\geq 200$ bp, N50 of 9,643 bp) and the completeness of the final assembly: CEGMA scores: 93.15% complete and 99.19% partially complete, BUSCO scores for the reference Arthropod gene set: 74% complete, 4.5% duplicated, 16% fragmented and 8.4% missing. We note that the *P. nigriventris* assembly, although fragmented, has higher completeness (in terms of complete Core Eukaryote Genes) than the genome of *Ceratosolen solmsi* (CEGMA: 88% complete), the only published fig wasp genome (Xiao et al., 2013). Repetitive elements made up 21.4% of the reference assembly and were excluded from subsequent analyses.

Processing of the filtered and aligned reads (mean coverage per individual of 3.7x) identified 1,837,396 SNPs. The average pairwise diversity per site (after filtering) for the North and South populations were very similar ( $\pi = 0.000884$  and  $0.000822$  respectively). This is one of the lowest estimate of genetic diversity reported for any sexually reproducing arthropod (Leffler et al., 2012; Romiguier et al., 2014). Pairwise *Fst* was 0.74, indicating high differentiation between the Northern and Southern populations.

## Inferring divergence with continuous migration and admixture

Our block extraction protocol resulted in 775,977 blocks of 387 base pairs (Cooper et al., 2020b). Of these, 0.8% (5,872) contained both shared variants and fixed difference, violating the 4-gamete test, and were excluded from blockwise analyses.



374 *Isolation with continuous migration (IM)*. Models incorporating post-divergence migration and  
different effective population sizes ( $N_e$ ) received substantially greater support than otherwise  
376 equivalent models with no migration and/or a single  $N_e$  parameter (Table 1a). The best-supported  
direction of migration is from South to North, irrespective of whether we assumed a single  $N_e$   
378 (compare model IM3 to IM2) or two  $N_e$  parameters (compare IM7+IM9 to models IM6+IM8). The  
scenario in which the Southern population retained the ancestral  $N_e$  (IM9; Figure S2) had highest  
380 support. Under this model, the split between the two populations occurred 177 (95% C.I. 172–182)  
thousand years ago (kya) and the  $N_e$  for the ancestral/Southern population was estimated to be  
382 slightly higher (69k, 95% C.I. 65.4k–72.6k) than for the Northern population (58k 95% C.I. 54.3k–  
61.5k). We inferred a migration rate  $M$  from South to North of 0.071. Although low (1 migrant from  
384 South to North every 28 generations), this estimate was significantly greater than zero (95% C.I.  
0.045 – 0.097).

386 *Isolation with instantaneous admixture (ADM)*. Inferences for models assuming instantaneous  
admixture mirrored those for IM models both in terms of model comparisons and parameter  
388 estimates: scenarios with gene flow and two  $N_e$  parameters were significantly better supported  
than otherwise equivalent models without admixture and/or a single  $N_e$  (Table 1b). The best-  
390 supported admixture direction was again from South to North, and the model assuming that the  
Southern population retained the ancestral  $N_e$  (ADM10; Figure S2) had greatest support.  $N_e$   
392 estimates under the best fitting ADM history were similar to those under the analogous IM model  
(IM9): we inferred an ancestral/Southern  $N_e$  of 69k (95% C.I. 66.1k–72.6k) and a lower Northern  $N_e$   
394 of 59k (55.2k–62.2k). In contrast, under the best fitting ADM9 the population split was estimated  
196kya (95% C.I. 193–198kya), slightly older than under the analogous IM model. The admixture  
396 event was inferred to have occurred 57kya (95% C.I. 53–62kya) (Table 1b) and around a quarter  
(admixture fraction  $f = 0.239$ , 95% C.I. 0.206–0.272) of Northern lineages are inferred to have  
398 originated from the Southern population.

*Greater support of instantaneous admixture*. The ADM model had greater support than the IM  
400 model ( $\Delta\ln\text{CL} = 4175$ ). Since the blockwise composite likelihood calculation ignores linkage  
between blocks and given that IM and ADM models are not nested, we cannot use a likelihood  
15



ratio test to compare the support for these models. To confirm whether the simpler IM model fits significantly worse than the ADM model we obtained a critical value for  $\Delta\ln CL$  (155.4 at  $p=0.05$ ) using a fully parametric bootstrap. The difference in model support in favour of the ADM model  $\Delta\ln CL = 4175$  in the real data far exceeds this and confirms that admixture provides a better fit to our data than continuous gene flow. To investigate which aspect of blockwise variation in the data allows discrimination between instantaneous admixture (ADM) and continuous migration (IM), we compared the frequencies of the most common bSFS configurations in the data with those expected under the best fitting IM and ADM models (Figure S6). Inspection of the residual reveals that the ADM model predicts both the frequency of monomorphic blocks ( $\{0,0,0,0\}$ ) and blocks with more than three fixed differences ( $\{0,0,>3,0\}$ ) better than the IM model.

## **PSMC supports divergence and instantaneous admixture from South to North**

We used PSMC (Li & Durbin 2011) to infer trajectories of population size change for Northern and Southern populations. Comparing the trajectories both with each other and with parameters inferred under the best fitting models of divergence and gene flow (ADM10) reveals a close correspondence between blockwise analyses and PSMC in several respects (Fig. 4). First, PSMC trajectories are consistent with the blockwise inference of a slightly larger  $N_e$  in the Southern population compared to the North. Second, the divergence time inferred by the blockwise analyses corresponds to a period in the PSMC at which the Northern and Southern populations show similar  $N_e$  (overlapping confidence intervals), consistent with a shared ancestral population. Finally, PSMC infers an increase in the Northern  $N_e$  prior to the time of admixture inferred under the ADM model. Such an increase in genetic diversity in the (Northern) recipient population is exactly what would be expected from a sudden admixture event. We note that PSMC also reveals an increase in the Southern  $N_e$  around the same time which, however, is markedly smaller. While PSMC also shows an increase in  $N_e$  in the very recent past (i.e. the last 3ky), the variation among bootstrap replicates (Fig. 5) suggests that our data lack the signal to reliably infer population size change over this timescale.

# Discussion

## Individual level population genomics of very small insects

We generated genomic libraries for individual male fig wasps, each only 1.5 mm long, resulting in over 770 thousand aligned blocks of sequence containing an average of 1.5 variable sites. Even with minimal samples of two haploid individuals per population, whole genome data allows estimation of demographic parameters with high confidence. The best supported IM and ADM models gave similar estimates for the age of the initial divergence between Northern and Southern *P. nigriventris* populations, and their sizes. Further, we show that a burst of admixture (ADM) provides a significantly better fit than ongoing gene flow to the blockwise data and the individual population  $N_e$  trajectories inferred by PSMC analysis. We first place our results in the broader context of phylogeographic work on taxa spanning the Burdekin and St. Lawrence Gaps, and then discuss the potential limits of our demographic inferences.

## Pleistocene population divergence and gene flow across the Burdekin and St Lawrence Gaps in *P. nigriventris*

Australia has a complex climate history, a major feature of which is the aridification that started in the Miocene and continued throughout the Pliocene and Pleistocene (Schauble & Moritz, 2001; Martin, 2006; MacQueen et al., 2010, Frankham et al., 2016). This resulted in the gradual restriction of rain forests to the Eastern coast of Australia, separated from more arid inland habitats by the Great Dividing Range (Kershaw 1994; McGuigan et al., 1998; Schneider et al., 1998; Pope et al., 2000, Bell et al., 2007). Between 280 and 205kya, decreased precipitation and more severe aridification were associated with major faunal turnover in rainforest taxa (Hocknull et al., 2007). Against the backdrop of this general trend, the Pleistocene climate oscillations drove cycles of rain forest expansion during warmer, wetter interglacials and contraction during cooler, drier glacials (Byrne 2008; Maldonado et al., 2012; Burke et al., 2013). The current dry habitat corridors of the Burdekin and St. Lawrence Gaps are thought to be products of the long term aridification of

454 Australia, and though it is uncertain when they first formed, they most likely existed through  
multiple Pleistocene cycles (Bryant & Krosch, 2016).

456 We found a strong signature of population divergence over the combined Burdekin and St.  
Lawrence gaps in *Pleistodontes nigriventris*. This is perhaps to be expected, given the obligate  
458 dependence of *P. nigriventris* on *Ficus watkinsiana*, and the restriction of this fig species to rain  
forest (Dixon 2003). However, our analyses do not allow inference of the ancestral distribution of *P.*  
460 *nigriventris*, and are compatible with either population being founded from the other, or vicariance  
of a previously continuous rainforest distribution (Martin, 2006). The best fitting IM and ADM  
462 models for *P. nigriventris* agree that the divergence between the Northern and Southern  
populations occurred 170-200kya ago, in the Late Pleistocene.

464 In a review encompassing a wide range of plant and animal taxa, Bryant and Krosch (2016)  
identified a signature of population subdivision for the Burdekin Gap in 18 of 27 studies (nine of  
466 which have divergence time estimates) and for the St. Lawrence Gap in 10 of 23 studies (six of  
which have divergence time estimates). Pleistocene divergence across the Burdekin Gap has also  
468 been inferred for *Melomys cervinipes* (a wet forest rodent (Bryant & Fuller (2014))), *Petaurus*  
*australis* (yellow-bellied glider (Brown et al., 2006)), and *Varanus varius* (a large lizard with broad  
470 habitat preferences (Smitsen et al., (2013))). Very few studies have considered insect population  
structure across the same potential barriers to gene flow. In contrast to our results for *P.*  
472 *nigriventris*, Schiffer et al., (2007) found no evidence for genetic divergence across the Burdekin  
gap in *Drosophila birchii*, a specialist rainforest fruit fly, but instead inferred a moderate gene flow  
474 across the whole range following a recent range expansion. Divergence estimates for other taxa  
spanning the Burdekin and/or St Lawrence Gaps are concentrated in the late Miocene to late  
476 Pleistocene (Bryant & Krosch 2016) with substantial variation across taxa. For example,  
divergence across the Burdekin Gap was estimated to have occurred in the early Miocene-late  
478 Oligocene >20 million years ago (mya) in *Uperoleia* frogs (Catullo & Keogh 2014; Catullo et al.,  
2014), and 31-51mya in assassin spiders (Rix & Harvey 2012). Given that most of these previous  
480 estimates are not based on any statistical model of population divergence, but rather a single  
(often mitochondrial) gene tree, it is unclear how much of the variation in previous divergence time  
18

estimates across these co-distributed taxa simply reflects coalescence variance and/or differences in calibration. Model based comparative studies are needed to assess whether past vicariance events have been shared in time across taxa with disjunct distribution across the Burdekin and St Lawrence gap.

## **The Northern population of *P. nigriventris* received a burst of admixture from the South at the end of the Pleistocene**

Both the best fitting ADM and IM models inferred gene flow from the Southern to the Northern population. While the continuous migration rate inferred under the best IM model ( $M = 0.071$ ) is much lower than the estimated admixture fraction ( $f=0.24$ ) under the better supported ADM model, the overall amount of gene flow inferred under both models is in fact very similar: Under the IM model, the probability that a single lineage sampled from the North is derived from the South via gene flow is  $1-e^{(-MT)}$ . Given our estimates for these parameters in model IM9, this is  $\sim 0.3$ , so very comparable to the admixture fraction inferred under the best ADM model. While both models agree in the overall amount of post-divergence gene flow, our model comparison clearly shows that genetic exchange occurred as a sudden burst rather than a continuous process. Additional support for a discrete admixture event comes from the contemporary increase in the Northern population size revealed by PSMC. The inferred combination of divergence and admixture is compatible with the following demographic scenario: (i) Northern and Southern populations were separated 170-200 kya following contraction of suitable habitat and expansion of intervening inhospitable dry forest corridors. (ii) Northern and Southern populations remained separated for over 100ky until favourable conditions in the late Pleistocene allowed expansion of one or both populations of *Ficus watkinsiana*, to the point at which substantial genetic exchange was possible between populations of pollinating *P. nigriventris*. (iii) Subsequent aridification resulted again in range contractions and a shutdown of gene flow.

Notwithstanding the uncertainty in our time calibration for *P. nigriventris*, the date of the inferred admixture event falls in Marine Isotope Stage 3 (27-60kya), a period in the late Pleistocene

characterised globally by abrupt phases of warming and cooling (Siddall et al., 2008; Van  
 510 Meerbeeck et al., 2009). These warming phases were interspersed by cooler periods around every  
 7,000 years (Clark et al., 2007), and even during the cooler periods average temperatures were  
 512 much higher than during the Last Glacial Maximum (~19-21kya) (Van Meerbeeck et al., 2009). The  
 lower bound (53kya) of the inferred admixture time corresponds approximately to the warmest  
 514 point in one of these cycles, and it is tempting to suggest that this allowed temporary expansion of  
 the range of the *F. watkinsiana*/*P. nigriventris* mutualism and secondary genetic contact.

516 Our results do not rule out bidirectional dispersal, but rather imply a signal of predominant  
 gene flow from the South into the North. This could indicate conditions that facilitated northwards  
 518 dispersal in this direction, such as prevailing winds from the south. Records from the 1940s-2000s  
 do indicate stronger winds from the south in eastern Australia (Australian Government, Bureau of  
 520 Meteorology, <http://www.bom.gov.au/climate/>). However, it is not known whether current trends  
 can be extended back into the past. Similar post-divergence dispersal from south to north across  
 522 the Burdekin gap has been inferred in a small number of other rain forest-associated taxa (Bryant  
 & Fuller, 2014; Bryant & Krosch 2016). Alternatively, the asymmetry in genetic exchange between  
 524 North and South we infer may be the result of genetic incompatibilities that arose and became  
 fixed during periods of isolation.

## 526 **Limits of demographic inference**

Demographic analyses that are based on genome-wide samples of either single variants or  
 528 loci/blocks generally assume that blocks are statistically independent. A common way of dealing  
 with linkage effects is to use subsampling, either by sampling a fixed minimum distance apart or by  
 530 resampling bootstrap. We have instead opted for a fully parametric bootstrap that incorporates  
 linkage between blocks explicitly. Although this is computationally more intensive than  
 532 subsampling, we believe it is the only way to accurately capture the effect on parameter estimates.  
 Our parametric bootstrap for the best fitting IM and ADM models gave narrow 95% confidence  
 534 intervals for all model parameters. Importantly, mean parameter estimates obtained from the  
 simulation replicates are very close to the MLEs used to simulate the datasets (Table 1). This

confirms that biases in parameter estimates due to violations of the assumption of no recombination within blocks are negligible, as shown in previous studies on a range of organisms (Jennings & Edwards, 2005; Lanier & Knowles, 2012; Hearn et al., 2014; Bunnefeld et al., 2015; Wang & Liu, 2016). Another standard assumption of demographic inference is that sequences evolve neutrally. While our approach sampled blockwise sequence variation genome-wide, one would expect both genome assembly and read mapping to be easier in regions under selective constraint. As a consequence, our blockwise dataset is likely enriched for conserved coding regions. In a methodologically similar study of a European gall wasp, Hearn et al., (2014) tested for the effect of selective constraint by partitioning blocks according to the proportion of coding sequence they contained, and scaling the estimated genome-wide mutation rate between values for synonymous and non-synonymous mutations. They found that mutation rate heterogeneity had no impact on the inference, reporting only a slight increase in  $N_e$  and divergence time estimates. Given these results and the lack of annotated genomes or transcriptome data to aid gene detection, we have not pursued this here. However, it will be interesting to check whether selective constraint can explain the observed higher frequency of invariant blocks in our *P. nigriventris* data compared to expectations under both the best fitting IM and ADM models. Taken together, these results suggest that recombination within blocks and background selection had a minimal impact on our inference of demographic history.

Scaling divergence and admixture times into years requires knowledge of both the mutation rate and generation time. Both are uncertain for *P. nigriventris*. In the absence of direct mutation rate estimates for fig wasps, we used an estimate from *Drosophila melanogaster* (Keightley et al., 2014). While it is unclear how well this matches mutation rates in fig wasps, it is reassuring that the few published mutation rate estimates for other insects are similar (e.g.  $2.9 \times 10^{-9}$  for the butterfly *Heliconius melpomene*). A likely greater source of calibration uncertainty is the generation time, which is unknown for *P. nigriventris* and fig wasps in general. Liu et al. (2014) give 2-3 generations per year for the *Wiebesia* sp. fig wasp pollinator of a dioecious fig in eastern China, but we are unaware of any estimates for pollinating wasps associated with monoecious fig species. The lack of precise generation time information is due primarily to the fact that, like many tropical

564 monoecious figs, *F. watkinsiana* fruits asynchronously year round (Harrison, 2005), with no clear  
seasonal cycle to entrain pollinator generations. Based on personal observation (JMC and Tim  
566 Sutton, Western Sydney University), a range of 2-6 generations per year seems likely. Assuming 2  
and 6 generations per year (rather than 4 as we have done here) would still place divergence and  
568 admixture times for *P. nigriventris* in the late Pleistocene. However, in the absence of precise  
information our attempt to match the demographic history of *P. nigriventris* to past climatic events  
570 remains speculative.

572 All three demographic scenarios we have considered (IM, ADM and PSMC) are obviously crude  
simplifications of what is likely a more complex history possibly involving repeated cycles of rain  
574 forest expansion and contraction. The upland wet forests south of the Burdekin Gap in the Clarke  
Range and Conway Peninsula are thought to have persisted through multiple Pleistocene climate  
576 cycles (Stuart-Fox et al., 2001), and it would be interesting in future to explore more realistic  
histories involving repeated admixture (Jésus et al., 2006) in *P. nigriventris* and *F. watkinsiana*.  
578 However, the fact that our parameter estimates are consistent across models and the close fit of  
the ADM model to the blockwise data in absolute terms, suggest that we have captured key  
580 aspects of the demographic history of *P. nigriventris*. It is also encouraging that, as we have  
shown, continuous and discrete gene flow can be clearly distinguished in this species, even over  
582 relatively recent timescales (both in terms of sequence divergence and genetic drift).

Our results show that robust demographic inferences can be made for very small sample sizes of  
584 non-model taxa without significant associated genomic resources. Such approaches are likely to  
be increasingly useful for taxa that are rare or hard to sample. Figs support highly structured (and  
586 often co-evolved) communities of pollinators, inquilines and natural enemies (Lopez-Vaamonde et  
al., 2001; Segar et al., 2014), and while a growing body of work addresses phylogeographic  
588 relationships in figs and their pollinators (Bain et al., 2016; Rodriguez et al., 2017; Yu et al., 2019),  
much less is known about the phylogeography of non-pollinating fig wasps (Sutton et al., 2016).  
590 Our approach provides a framework for comparative analyses that reconstruct the assembly of  
these species-rich communities. More broadly, given that many questions about both intraspecific



demography history and speciation come down to distinguishing between ongoing gene flow and discrete admixture pulses, systematic power analyses on how this can best be achieved - especially for genomic data from non-model organisms without a contiguous reference genome - are urgently needed.

## Acknowledgements

This work was funded by a UK NERC grant (NE/J010499) to GS, KL and JMC. LC was supported by a PhD studentship from the UK NERC. KL was supported by a NERC fellowship (NE/L011522/1)

## References

- Aeschbacher, S., Selby, J. P., Willis, J. H. & Coop, G. (2017). Population-genomic inference of the strength and timing of selection against gene flow. *Proceedings of the National Academy of Sciences of the USA*, 114, 7061-7066. <https://doi.org/10.1073/pnas.1616755114>
- Ahmed, S., Compton, S. G., Butlin, R. K., & Gilmartin P. M. (2009). Wind-borne insects mediate directional pollen transfer between desert fig trees 160 kilometers apart. *Proceedings of the National Academy of Sciences of the USA*, 106, 20342-20347. <https://doi.org/10.1073/pnas.0902213106>
- Bain, A., Borges, R. M., Chevallier, M. H., Vignes, H., Kobmoo, N., Peng, Y. Q., Cruaud, A., Rasplus, J. Y., Kjellberg, F., & Hossaert-Mckey, M. (2016). Geographic structuring into vicariant species-pairs in a wide-ranging, high-dispersal plant–insect mutualism: the case of *Ficus racemosa* and its pollinating wasps. *Evolutionary Ecology*, 30, 663–684. <https://doi.org/10.1007/s10682-016-9836-5>
- Bankevich, A., Nurk, S., Antipov, D., Gurevich, A. A., Dvorkin, M., Kulikov, A. S. .... & Pevzner, P. A. (2012). SPAdes: a new genome assembly algorithm and its applications to single cell sequencing. *Journal of Computational Biology*, 19, 455-477. <https://doi.org/10.1089/cmb.2012.0021>
- Baker, C. H., Graham, G. C., Scott, K. D., Cameron, S. L., Yeates, D. K. & Merritt, D. J. (2008). Distribution and phylogenetic relationships of Australian glow-worms *Arachnocampa* (Diptera, Keroplatidae)', *Molecular Phylogenetics and Evolution* 48, 506-514. <https://doi.org/10.1016/j.ympev.2008.04.037>
- Bell, K. L., Moritz, C., Moussalli, A. & Yeates, D. K. (2007). Comparative phylogeography and speciation of dung beetles from the Australian Wet Tropics rainforest. *Molecular Ecology*, 16, 4984-4998. <https://doi.org/10.1111/j.1365-294X.2007.03533.x>
- The impact of global selection on local adaptation and reproductive isolation  
Bisschop, G., Setter, D., Rafajlović, M., Baird, S. J. E. & Lohse, K. (2019). bioRxiv 855320. <https://doi.org/10.1101/855320>
- Brown, M., Cooksley, H., Carthew, S M. & Cooper, S. J. B. (2006). Conservation units and phylogeographic structure of an arboreal marsupial, the yellow-bellied glider (*Petaurus australis*). *Australian Journal of Zoology*, 54, 305-317. <https://doi.org/10.1071/ZO06034>

- 638 Bryant, L. M. & Fuller, S. J. (2014). Pleistocene climate fluctuations influence phylogeographical  
640 patterns in *Melomys cervinipes* across the mesic forests of eastern Australia. *Journal of  
Biogeography*, 41, 1923-1935. <https://doi.org/10.1111/jbi.12341>
- 642 Bryant, L. M. & Krosch, M. N. (2016). Lines in the land: a review of evidence for eastern Australia's  
644 major biogeographical barriers to closed forest taxa. *Biological Journal of the Linnean Society*, 119,  
238-264. <https://doi.org/10.1111/bij.12821>
- 646 Buchfink, B., Xie, C. & Huson, D. H. (2015). Fast and sensitive protein alignment using DIAMOND.  
*Nature Methods*, 12, 59-60. <https://doi.org/10.1038/nmeth.3176>
- 648 Bunnefeld, L., Hearn, J., Stone, G.N. & Lohse, K. (2018). Whole genome data reveal the complex  
650 history of a diverse ecological community. *Proceedings of the National Academy of Sciences of the  
United States of America*. 115, E6507-E6515. <https://doi.org/10.1073/pnas.1800334115>
- 652 Burke, J. M., Ladiges, P.Y., Batty, E. L., Adams, P. B., Bayly, M. J. & Katinas, L. (2013). Divergent  
654 lineages in two species of *Dendrobium* orchids (*D. speciosum* and *D. tetragonum*) correspond to  
656 major geographical breaks in eastern Australia. *Journal of Biogeography*, 40, 2071-2081.  
<https://doi.org/10.1111/jbi.12145>
- 658 Byrne, M. (2008). Evidence for multiple refugia at different time scales during Pleistocene climatic  
660 oscillations in southern Australia inferred from phylogeography. *Quaternary Science Reviews*, 27,  
2576-2585.
- 662 Catullo, R. A. & Keogh, J. S. (2014). Aridification drove repeated episodes of diversification  
664 between Australian biomes: evidence from a multi-locus phylogeny of Australian toadlets  
(*Uperoleia*: Myobatrachidae). *Molecular Phylogenetics and Evolution*, 79, 106–117.  
<https://doi.org/10.1016/j.ympev.2014.06.012>
- 666 Catullo, R. A., Lanfear, R., Doughty, P. & Keogh, J. S. (2014). The biogeographical boundaries of  
668 northern Australia: evidence from ecological niche models and a multi-locus phylogeny of  
*Uperoleia* toadlets (Anura: Myobatrachidae). *Journal of Biogeography*, 41, 659–672.  
670 <https://doi.org/10.1111/jbi.12230>
- 672 Chapple, D. G., Hoskin, C. J., Chapple, S. N. & Thompson, M. B. (2011). Phylogeographic  
674 divergence in the widespread delicate skink (*Lampropholis delicata*) corresponds to dry habitat  
676 barriers in eastern Australia. *BMC Evolutionary Biology*, 11, 191. <https://doi.org/10.1186/1471-2148-11-191>
- 678 Chen, Y., Compton, S. G., Liu, M. & Chen, X. Y. (2012). Fig trees at the northern limit of their  
680 range: the distributions of cryptic pollinators indicate multiple glacial refugia. *Molecular Ecology*, 21,  
1687-1701. <https://doi.org/10.1111/j.1365-294X.2012.05491.x>
- 682 Clark, P. U., Hostetler, S. W., Pisias, N. G., Schmittner A. & Meissner, K. J. (2007). Mechanisms  
684 for an ~7-Kyr climate and sea-level oscillation during marine isotope stage 3. In: *Ocean  
Circulation: Mechanisms and Impacts—Past and Future Changes of Meridional Overturning*.  
686 American Geophysical Union. Geophysical Monograph Series, Volume 173.  
<https://doi.org/10.1029/173GM15>
- 688 Cook, James M. & Rasplus, J.-Y. (2003). Mutualists with attitude: coevolving fig wasps and figs.  
*Trends in Ecology & Evolution*, 18, 241-248. [https://doi.org/10.1016/S0169-5347\(03\)00062-4](https://doi.org/10.1016/S0169-5347(03)00062-4)
- 690 Cooper, L., Bunnefeld, L., Hearn, J., Cook, J. M., Lohse, K. & Stone, G. N. (2020)a.  
692 Phylogeography of *Pleistodontes nigriventris* from northern and southern populations in Australia.  
Sequence read data in the European Nucleotide Archive, Study PRJEB35527. Available from  
<https://www.ebi.ac.uk/ena/browser/view/PRJEB35527>

- Cooper, L., Bunnefeld, L., Hearn, J., Cook, J. M., Lohse, K. & Stone, G. N. (2020)b. Phylogeography of *Pleistodontes nigriventris* from northern and southern populations in Australia. Trimmed sequence block data and associated *Mathematica* notebook for blockwise analyses. Available from the Dryad Digital Repository, doi:// (to be added on acceptance).
- DePristo, M. A., Banks, E., Poplin, R., Garimella, K. V., Maguire, J. R., Hartl, C. ... & Daly, M. J. (2011). A framework for variation discovery and genotyping using next-generation DNA sequencing data. *Nature Genetics*, 43, 491-498. <https://doi.org/10.1038/ng.806>
- Dixon, D. J. (2003). A taxonomic revision of the Australian *Ficus* species in the section Malvanthera (*Ficus* subg. *Urostigma*: Moraceae). *Telopea*, 10, 125-153. <https://doi.org/10.7751/telopea20035611>
- Dolman, G. & Moritz, C. (2006). A multilocus perspective on refugial isolation and divergence in rainforest skinks (*Carlia*). *Evolution*, 60, 573-582. <https://doi.org/10.1554/05-487.1>
- Durand E. Y., Patterson N., Reich D., & Slatkin, M. (2011). Testing for ancient admixture between closely related populations. *Molecular Biology and Evolution*, 28, 2239–2252. <https://doi.org/10.1093/molbev/msr048>
- Felsenstein, J. 2003. *Inferring Phylogenies*. Sinauer, 664pp.
- Frankham, G. J., Handasyde, K. A. & Eldridge, M. D. B (2016). Evolutionary and contemporary responses to habitat fragmentation detected in a mesic zone marsupial, the long-nosed potoroo (*Potorous tridactylus*) in south-eastern Australia. *Journal of Biogeography*, 43, 653-665. <https://doi.org/10.1111/jbi.12659>
- García-Alcalde, F., Okonechnikov, K., Carbonell, J., Cruz, L. M., Götz, S., Tarazona, S., Dopazo, J., Meyer, T. F. & Conesa, A. (2012). Qualimap: evaluating next-generation sequencing alignment data. *Bioinformatics*, 28, 2678–2679. <https://doi.org/10.1093/bioinformatics/bts503>
- Greeff, J. M., van Vuuren, G. J. J., Kryger, P. & Moore, J. C. (2009). Outbreeding and possibly inbreeding depression in a pollinating fig wasp with a mixed mating system. *Heredity*, 102, 349-356. <https://doi.org/10.1038/hdy.2009.2>
- Haine, E. R., & Cook, J. M. (2005). Convergent incidences of *Wolbachia* infection in fig wasp communities from two continents. *Proceedings of the Royal Society of London, Series B Biological Sciences*, 272, 421-429. <https://doi.org/10.1098/rspb.2004.2956>
- Hare, M. P. (2001). Prospects for nuclear gene phylogeography. *Trends in Ecology & Evolution*, 16, 700-706. [https://doi.org/10.1016/S0169-5347\(01\)02326-6](https://doi.org/10.1016/S0169-5347(01)02326-6)
- Harrison, R. D. (2003). Fig wasp dispersal and the stability of a keystone plant resource in Borneo. *Proceedings of the Royal Society of London, Series B Biological Sciences*, 270, Suppl 1: S76-9.
- Harrison, R.D. (2005) Figs and the diversity of tropical rainforests. *Bioscience* 55, 1053-1064. <https://doi.org/10.1098/rsbl.2003.0018>
- Harrison, R. D. & Rasplus, J.-Y. (2006). Dispersal of fig pollinators in Asian tropical rain forests. *Journal of Tropical Ecology*, 22, 631-639. <https://doi.org/10.1017/S0266467406003488>
- Hearn, J., Stone, G. N., McInnes, L., Nicholls, J. A., Barton, N. H. & Lohse, K. (2014). Likelihood-based inference of population history from low coverage de novo genome assemblies. *Molecular Ecology* 23, 198-211. <https://doi.org/10.1111/mec.12578>

- Hey, J. & Nielsen, R. (2004). Multilocus methods for estimating population sizes, migration rates and divergence time, with applications to the divergence of *Drosophila pseudoobscura* and *D. persimilis*. *Genetics*, 167, 747-60. <https://doi.org/10.1534/genetics.103.024182>.
- Hocknull, S. A., Zhao, J.-X., Feng, Y.-X. & Webb, G. E. (2007). Responses of Quaternary rainforest vertebrates to climate change in Australia. *Earth and Planetary Science Letters*, 264, 317-331. <https://doi.org/10.1016/j.epsl.2007.10.004>
- Jennings, W. B. & Edwards, S. V. (2005). Speciation history of Australian grass finches (*Poephila*) inferred from thirty gene trees. *Evolution*, 59, 2033-2047. <https://doi.org/10.1111/j.0014-3820.2005.tb01072.x>
- Jermiin, L. S. & Crozier, R. H. (1994). The cytochrome b region in the mitochondrial DNA of the ant *Tetraponera rufoniger*: sequence divergence in Hymenoptera may be associated with nucleotide content. *Journal of Molecular Evolution*, 38, 282-294. <https://doi.org/10.1007/BF00176090>
- Jesus, F. F., Wilkins, J. F., Solferini, V. N. & Wakeley, J. (2006). Expected coalescence times and segregating sites in a model of glacial cycles. *Genetic and Molecular Research*, 5, 466-474.
- Keightley, P. D., Ness, R. W., Halligan, D. L. & Haddrill, P. R. (2014). Estimation of the spontaneous mutation rate per nucleotide site in a *Drosophila melanogaster* full-sib family. *Genetics*, 196, 313-320. <https://doi.org/10.1534/genetics.113.158758>
- Keightley, P. D., Pinharanda, A., Ness, R. W., Simpson, F., Dasmahapatra, K. K., Mallet, J., Davey, J. W. & Jiggins C. D. (2015). Estimation of the spontaneous mutation rate in *Heliconius melpomene*. *Molecular Biology and Evolution*, 32, 239-243. <https://doi.org/10.1093/molbev/msu302>
- Kelleher, J., Etheridge, A. M. & McVean, G. (2016). Efficient coalescent simulation and genealogical analysis for large sample sizes. *PLoS Computational Biology*, 12, e1004842. <https://doi.org/10.1371/journal.pcbi.1004842>
- Kershaw, A. P. (1994). Pleistocene vegetation of the humid tropics of northeastern Queensland, Australia. *Paleoclimatology, Paleogeography, Paleoecology*, 109, 399-412. [https://doi.org/10.1016/0031-0182\(94\)90188-0](https://doi.org/10.1016/0031-0182(94)90188-0)
- Kobmoo, N., Hossaert-McKey, M., Rasplus, J.-Y. & Kjellberg, F. (2010). *Ficus racemosa* is pollinated by a single population of a single agaonid wasp species in continental South-East Asia. *Molecular Ecology*, 19, 2700-2712. <https://doi.org/10.1111/j.1365-294X.2010.04654.x>
- Kumar, S., Jones, M., Koutsovoulos, G., Clarke, M. & Blaxter, M. (2013). Blobology: exploring raw genome data for contaminants, symbionts and parasites using taxon-annotated GC-coverage plots', *Frontiers in Genetics*, 4, 237. <https://doi.org/10.3389/fgene.2013.00237>
- Langmead, B., & Salzberg, S. L. (2012). Fast gapped-read alignment with Bowtie 2. *Nature Methods*, 9, 357-359. <https://doi.org/10.1038/nmeth.1923>
- Lanier, H. C., & Knowles, L. L.(2012). Is recombination a problem for species-tree analyses? *Systematic Biology*, 61, 691-701. <https://doi.org/10.1093/sysbio/syr128>
- Li, H. (2011). A statistical framework for SNP calling, mutation discovery, association mapping and population genetical parameter estimation from sequencing data. *Bioinformatics*, 27, 2987-2993. <https://doi.org/10.1093/bioinformatics/btr509>
- Li, H. & Durbin, R. (2009). Fast and accurate short read alignment with Burrows-Wheeler transform. *Bioinformatics*, 25, 1754-1760. <https://doi.org/10.1093/bioinformatics/btp324>



- Li, H. & Durbin, R. (2011). Inference of human population history from individual whole-genome sequences. *Nature*, 475, 493-496. <https://doi.org/10.1038/nature10231>
- Li, H., Handsaker, B., Wysoker, A., Fennell, T., Ruan, J., Homer, N., Marth, G., Abecasis, G., Durbin, R. & Subgroup Genome Project Data Processing. (2009). The Sequence Alignment/Map format and SAMtools. *Bioinformatics*, 25, 2078-2079. <https://doi.org/10.1093/bioinformatics/btp352>
- Liu, M., Compton, S. G., Peng, F. E., Zhang, J. & Chen, X. Y. (2015). Movements of genes between populations: are pollinators more effective at transferring their own or plant genetic markers?', *Proceedings of the Royal Society of London, Series B Biological Sciences*, 282, 20150290. <https://doi.org/10.1098/rspb.2015.0290>
- Lohse, K., Chmelik, M., Martin, S. H. & Barton, N. H. (2016). Efficient strategies for calculating blockwise likelihoods under the coalescent. *Genetics*, 202, 775-786. <https://doi.org/10.1534/genetics.115.183814>
- Lohse, K. & Frantz, L. A. F. (2014). Neandertal admixture in Eurasia confirmed by maximum-likelihood analysis of three genomes. *Genetics*, 196, 1241-1251. <https://doi.org/10.1534/genetics.114.162396>
- Lohse, K., Harrison, R. J. & Barton, N. H. (2011). A general method for calculating likelihoods under the coalescent process. *Genetics*, 189, 977-987. <https://doi.org/10.1534/genetics.111.129569>
- Lopez-Vaamonde, C., Rasplus, J.Y., Weiblen, G.D., and Cook, J.M. (2001) Molecular phylogenies of fig wasps: Partial cocladogenesis of pollinators and parasites. *Molecular Phylogenetics and Evolution* 21, 55-71. <https://doi.org/10.1006/mpev.2001.0993>
- Lopez-Vaamonde, C., Dixon, D. J., Cook, J. M. & Rasplus, J.-Y. (2002). Revision of the Australian species of *Pleistodontes* (Hymenoptera: Agaonidae) fig-pollinating wasps and their host-plant associations. *Zoological Journal of the Linnean Society*, 136, 637-683. <https://doi.org/10.1046/j.1096-3642.2002.00040.x>
- Macqueen, P., Seddon, J. M., Austin, J. J., Hamilton, S. & Goldizen, A. W. (2010). Phylogenetics of the pademelons (Macropodidae: *Thylogale*) and historical biogeography of the Australo-Papuan region. *Molecular Phylogenetics and Evolution*, 57, 1134-1148. <https://doi.org/10.1016/j.ympev.2010.08.010>
- Macqueen, P., Seddon, J. M. & Goldizen, A. W. (2012). Effects of historical forest contraction on the phylogeographic structure of Australo-Papuan populations of the red-legged pademelon (Macropodidae: *Thylogale stigmatica*). *Austral Ecology*, 37, 479-490. <https://doi.org/10.1111/j.1442-9993.2011.02309.x>
- Maldonado, S. P., Melville, J., Peterson, G. N. L. & Sumner, J. (2012). Human-induced versus historical habitat shifts: identifying the processes that shaped the genetic structure of the threatened grassland legless lizard, *Delma impar*. *Conservation Genetics*, 13, 1329-1342. <https://doi.org/10.1007/s10592-012-0377-3>
- Male, T. D. & Roberts, G. E. (2005). Host associations of the strangler fig *Ficus watkinsiana* in a subtropical Queensland rain forest. *Austral Ecology*, 30, 229-236. <https://doi.org/10.1111/j.1442-9993.2005.01442.x>
- Markgraf, V., McGlone, M. & Hope, G. (1995). Neogene paleoenvironmental and paleoclimatic change in southern temperate ecosystems — a southern perspective. *Trends in Ecology & Evolution*, 10, 143-147. [https://doi.org/10.1016/S0169-5347\(00\)89023-0](https://doi.org/10.1016/S0169-5347(00)89023-0)

- 864 Martin, H. A. (2006). Cenozoic climatic change and the development of the arid vegetation in  
Australia. *Journal of Arid Environments*, 66, 533-563. <https://doi.org/10.1016/j.jaridenv.2006.01.009>
- 866 Martin, M. (2011). Cutadapt removes adapter sequences from high-throughput sequencing reads.  
*EMBnet journal*, 17, No 1: Next Generation Sequencing Data Analysis.  
868 <https://doi.org/https://doi.org/10.14806/ej.17.1.200>
- 870 Martin, S. H., Dasmahapatra, K. K., Nadeau, N. J., Salazar, C., Walters, J. R., Simpson, F.,  
Blaxter, M., Manica, A., Mallet, J. & Jiggins, C. D. (2013). Genome-wide evidence for speciation  
872 with gene flow in *Heliconius* butterflies. *Genome Research*, 23, 1817-1828.  
<https://doi.org/10.1101/gr.159426.113>
- 874 McGuigan, K., McDonald, K., Parris, K. & Moritz, C. (1998). Mitochondrial DNA diversity and  
876 historical biogeography of a wet forest-restricted frog (*Litoria pearsoniana*) from mid-east Australia.  
*Molecular Ecology*, 7, 175-186. <https://doi.org/10.1046/j.1365-294x.1998.00329.x>
- 878 McKenna, A., Hanna, M., Banks, E., Sivachenko, A., Cibulskis, K., Kernysky, A., Garimella, K.,  
880 Altshuler, D., Gabriel, S., Daly, M. & DePristo, M. A. (2010). The Genome Analysis Toolkit: a  
MapReduce framework for analyzing next generation DNA sequencing data, *Genome Research*,  
882 20, 1297-1303. <https://doi.org/10.1101/gr.107524.110>
- 884 Nicholls, J. A., & Austin, J. J. (2005). Phylogeography of an east Australian wet forest bird, the  
satin bowerbird (*Ptilonorhynchus violaceus*), derived from mtDNA, and its relationship to  
886 morphology. *Molecular Ecology*, 14, 1485-1496. <https://doi.org/10.1111/j.1365-294X.2005.02544.x>
- 888 Nielsen, R. & Wakeley, J. (2001). Distinguishing migration from isolation: a Markov Chain Monte  
Carlo approach. *Genetics*, 158, 885-896
- 890 Niu, L.-H., Song, X.-F., He, S. M., Zhang, P., Wang, N. X., Li, Y. & Huang, D. W. (2015). New  
892 insights into the fungal community from the raw genomic sequence data of fig wasp *Ceratosolen*  
*solmsi*. *BMC Microbiology*, 15, 27. <https://doi.org/10.1186/s12866-015-0370-3>
- 894 Nürnberger, B., Lohse, K., Fijarczyk, A., Szymura, J. M. & Blaxter, M. L. (2016). Para-allopatry in  
896 hybridizing fire-bellied toads (*Bombina bombina* and *B. variegata*): inference from transcriptome-  
wide coalescence analyses. *Evolution*, 70, 1803-1818. <https://doi.org/10.1111/evo.12978>
- 898 Okonechnikov, K., Conesa, A. & García-Alcalde, F (2016). Qualimap 2: advanced multi-sample  
900 quality control for high-throughput sequencing data. *Bioinformatics*, 32, 292–294.  
<https://doi.org/10.1093/bioinformatics/btv566>
- 902 Oswald, J. A., Overcast, I., Mauck, W. M., Andersen, M. J. & Smith, B. T. (2017). Isolation with  
904 asymmetric gene flow during the nonsynchronous divergence of dry forest birds. *Molecular*  
*Ecology*, 26, 1386-1400. <https://doi.org/10.1111/mec.14013>
- 906 Pope, L. C., Estoup, A. & Moritz, C. (2000). Phylogeography and population structure of an  
908 ecotonal marsupial, *Bettongia tropica*, determined using mtDNA and microsatellites. *Molecular*  
*Ecology*, 9, 2041-2053. <https://doi.org/10.1046/j.1365-294x.2000.01110.x>
- 910 Pope, L. C., Storch, D., Adams, M., Moritz, C. & Gordon, G. (2001). A phylogeny for the genus  
912 *Isoodon* and a range expansion for *I. obesulus peninsulae* based on mtDNA control region and  
morphology. *Australian Journal of Zoology*, 49, 411-434. <https://doi.org/10.1071/ZO00060>
- 914 Price, A. L., Jones, N. C. & Pevzner, P. A. (2005). *De novo* identification of repeat families in large  
916 genomes. *Bioinformatics*, 21 Suppl 1, i351-i358. <https://doi.org/10.1093/bioinformatics/bti1018>
- 918 Quinlan, A. R. & Hall, I. M. (2010). BEDTools: a flexible suite of utilities for comparing genomic  
features, *Bioinformatics*, 26, 841-842. <https://doi.org/10.1093/bioinformatics/btq033>

920 Ringbauer, H., Kolesnikov, A., Field, D. L. & Barton, N. H. (2018). Estimating barriers to gene flow  
922 from distorted isolation-by-distance patterns. *Genetics*, 208, 1231-1245.  
924 <https://doi.org/10.1534/genetics.117.300638>

926 Rix, M. G. & Harvey, M. S. (2012). Phylogeny and historical biogeography of ancient assassin  
928 spiders (Araneae: Archaeidae) in the Australian mesic zone: evidence for Miocene speciation  
930 within Tertiary refugia. *Molecular Phylogenetics and Evolution*, 62, 375-396.  
932 <https://doi.org/10.1016/j.ympev.2011.10.009>

934 Rodriguez, L. J., Bain, A., Chou, L.-S., Conchou, L., Cruaud, A., Gonzales, R., Hossaert-McKey,  
936 M., Rasplus, J.-Y., Tzeng, H.-Y. & Kjellberg, F. (2017). Diversification and spatial structuring in the  
938 mutualism between *Ficus septica* and its pollinating wasps in insular South East Asia. *BMC  
940 Evolutionary Biology*, 17, 207. <https://doi.org/10.1186/s12862-017-1034-8>

942 Rønsted, N., Weiblen, G. D., Savolainen, V. & Cook, J. M. (2008). Phylogeny, biogeography, and  
944 ecology of *Ficus* section Malvanthera (Moraceae). *Molecular Phylogenetics and Evolution*, 48, 12-  
946 22. <https://doi.org/10.1016/j.ympev.2008.04.005>

948 Schiffer, M., Kennington, W. J., Hoffmann, A. A. & Blacket, M. J. (2007). Lack of genetic structure  
950 among ecologically adapted populations of an Australian rainforest *Drosophila* species as indicated  
952 by microsatellite markers and mitochondrial DNA sequences. *Molecular Ecology*, 16, 1687-700. .  
954 <https://doi.org/10.1111/j.1365-294X.2006.03200.x>

956 Schäuble, C. S., & Moritz, C. (2001). Comparative phylogeography of two open forest frogs from  
958 eastern Australia. *Biological Journal of the Linnean Society*, 74, 157-70.  
960 <https://doi.org/10.1111/j.1095-8312.2001.tb01384.x>

962 Schneider, C. J., Cunningham, M. & Moritz, C. (1998). Comparative phylogeography and the  
964 history of endemic vertebrates in the Wet Tropics rainforests of Australia. *Molecular Ecology*, 7,  
966 487-498. <https://doi.org/10.1046/j.1365-294x.1998.00334.x>

968 Segar, S. T., Dunn, D. W., Darwell, C. T. & Cook, J. M. (2014). How to be a fig wasp down under:  
970 the diversity and structure of an Australian fig wasp community. *Acta Oecologica*, 57, 17-27.  
972 <https://doi.org/10.1016/j.actao.2013.03.014>

974 Siddall, M., Rohling, E. J., Thompson, W. G. & Waelbroeck, C. (2008). Marine isotope stage 3 sea  
976 level fluctuations: data synthesis and new outlook. *Reviews of Geophysics*, 46.  
978 <https://doi.org/10.1029/2007RG000226>

980 Simao, F. A., Waterhouse, R. M., Ioannidis, P., Kriventseva, E. V. & Zdobnov, E. M. (2015).  
982 BUSCO: assessing genome assembly and annotation completeness with single-copy orthologs.  
984 *Bioinformatics*, 31, 3210-3212. <https://doi.org/10.1093/bioinformatics/btv351>

986 Smissen, P. J., Melville, J., Sumner, J. & Jessop, T. S. (2013). Mountain barriers and river  
988 conduits: phylogeographical structure in a large, mobile lizard (Varanidae: *Varanus varius*) from  
990 eastern Australia. *Journal of Biogeography*, 40, 1729–1740. <https://doi.org/10.1111/jbi.12128>

992 Smit, A. F. A., Hubley, R. & Green, P. (2013-2015). *RepeatMasker Open-4.0*. 2013-2015  
994 <<http://www.repeatmasker.org>>.

996 Sousa, V. & Hey, J. (2013). Understanding the origin of species with genome-scale data: modelling  
998 gene flow. *Nature Reviews Genetics*, 14, 404–414. <https://doi.org/10.1038/nrg3446>

1000 Strasburg, J. L., & Rieseberg, L. H. (2010). How robust are “Isolation with Migration” analyses to  
1002 violations of the IM model? A simulation Study. *Molecular Biology and Evolution*, 27, 297-310.  
1004 <https://doi.org/10.1093/molbev/msp233>



- 978 Stuart-Fox, D. M., Schneider, C. J., Moritz, C. & Couper, P. J. (2001). Comparative  
phylogeography of three rainforest restricted lizards from mid-east Queensland. *Australian Journal*  
980 *of Zoology*, 49, 119–127. <https://doi.org/10.1071/ZO00092>
- 982 Stumpf, M. P. & McVean, G. A. (2003). Estimating recombination rates from population-genetic  
data. *Nature Reviews Genetics*, 4, 959-68. <https://doi.org/10.1038/nrg1227>
- 984 Sutton, T. L., Riegler, M. & Cook, J. M. (2016). One step ahead: a parasitoid disperses farther and  
986 forms a wider geographic population than its fig wasp host. *Molecular Ecology*, 25, 882-94.  
<https://doi.org/10.1111/mec.13445>
- 988 Treangen, T. J. & Salzberg, S. L. (2011). Repetitive DNA and next-generation sequencing:  
990 computational challenges and solutions. *Nature Reviews Genetics*, 13, 36-46.  
<https://doi.org/10.1038/nrg3117>
- 992 Van der Auwera, G. A., Carneiro, M. O., Hartl, C., Poplin, R., Del Angel, G., Levy-Moonshine, A., ...  
994 DePristo, M. A. (2013). From FastQ data to high confidence variant calls: the Genome Analysis  
Toolkit best practices pipeline. *Current Protocols in Bioinformatics*, 43, 11.10.1-33.  
996 <https://doi.org/10.1002/0471250953.bi1110s43>.
- 998 Van Meerbeeck, C. J., Renssen, H. & Roche, D. M. (2009). How did Marine Isotope Stage 3 and  
Last Glacial Maximum climates differ? – Perspectives from equilibrium simulations. *Climate of the*  
1000 *Past*, 5, 33-51. <https://doi.org/10.5194/cp-5-33-2009>
- 1002 Wachi, N., Kusumi, J., Tzeng, H. Y. & Su, Z. H. (2016). Genome-wide sequence data suggest the  
possibility of pollinator sharing by host shift in dioecious figs (Moraceae, *Ficus*). *Molecular Ecology*,  
1004 25, 5732-5746. <https://doi.org/10.1111/mec.13876>
- 1006 Wall, J. D. (2003). Estimating ancestral population sizes and divergence times. *Genetics*, 163, 395-  
404.
- 1008 Wang, Z. & Liu, K. J. (2016). A performance study of the impact of recombination on species tree  
analysis. *BMC Genomics*, 17, 785. <https://doi.org/10.1186/s12864-016-3104-5>
- 1012 Ware, A. B. & Compton, S. G. (1994)a. Dispersal of adult female fig wasps. 1. Arrivals and  
departures. *Entomologia Experimentalis et Applicata*, 73, 221–229. <https://doi.org/10.1111/j.1570-7458.1994.tb01859.x>
- 1014
- 1016 Ware, A. B. & Compton, S. G. (1994)b. Dispersal of adult female fig wasps. 2. Movements  
between trees. *Entomologia Experimentalis et Applicata*, 73, 231–238.  
1018 <https://doi.org/10.1111/j.1570-7458.1994.tb01860.x>
- 1020 Weber, L. C., Van der Wal, J., Schmidt, S., McDonald, W. J. F., Shoo, L. P. & Ladiges, P. (2014).  
Patterns of rain forest plant endemism in subtropical Australia relate to stable mesic refugia and  
1022 species dispersal limitations. *Journal of Biogeography*, 41, 222-38.  
<https://doi.org/10.1111/jbi.12219>
- 1024
- 1026 Werren, J. H., Richards, S., Desjardins, C. A., Niehuis, O., Gadau, J. & Colbourne, J. K. (2010).  
Functional and evolutionary insights from the genomes of three parasitoid *Nasonia* species.  
*Science*, 327, 343-348. <https://doi.org/10.1126/science.1178028>
- 1028
- 1030 Xiao, J. H., Yue, Z., Jia, L. Y., Yang, X. H., Niu, L. H., Wang, Z., ... Huang, D. W. (2013). Obligate  
mutualism within a host drives the extreme specialization of a fig wasp genome. *Genome Biology*,  
14, R141. <https://doi.org/10.1186/gb-2013-14-12-r141>
- 1032

- Yang, L. Y., Machado, C. A., Dang, X. D., Peng, Y. Q., Yang, D. R., Zhang, D. Y. & Liao, W. J. (2015). The incidence and pattern of co-pollinator diversification in dioecious and monoecious figs. *Evolution*, 69, 294-304. <https://doi.org/10.1111/evo.12584>
- Yu, H., Tian, E. W., Zheng, L. N., Deng, X. X., Cheng, Y. F., Chen, L. F. ... & Kjellberg, F. (2019) Multiple parapatric pollinators have radiated across a continental fig tree displaying clinal genetic variation. *Molecular Ecology*, 28, 2391-2405. <https://doi.org/10.1111/mec.15046>
- Zerbino, D. R. & Birney, E. (2008). Velvet: algorithms for *de novo* short read assembly using de Bruijn graphs. *Genome Research*, 18, 821-9. <https://doi.org/10.1101/gr.074492.107>
- Zhang, J., Kobert, K., Flouri, T. & Stamatakis, A. (2014). PEAR: a fast and accurate Illumina Paired-End reAd mergeR. *Bioinformatics*, 30, 614-620. <https://doi.org/10.1093/bioinformatics/btt593>

## Data Accessibility

The short read data have been deposited at the ENA short read archive (number PRJEB35527). CO1 barcode sequences for the four *Pleistodontes nigriceps* individuals have been deposited in Genbank: N1 MF597824; N2 MF597800; S1 MF597825; S2 MF597826).

The *Mathematica* notebook and blockwise sequence data for this study are available from the Dryad repository, doi: ([added on acceptance](#)).

## Author contributions.

LC, GNS, KL and JMC designed the research. LC, LB, KL and JH performed the research and analysed the data. GNS, KL and LC wrote the paper, with editorial input from all authors.

1060

1062

1064

1066

1068

**Table 1.** Maximum composite likelihood estimates (MCLE) of model support and demographic parameters under (a) IM and (b) ADM models. The best supported model is highlighted in bold with parameter 95% confidence intervals estimated by parametric bootstrap.  $n(N_e)$  indicates the number of population size parameters in the model, and  $N_a$  indicates the population(s) retaining the ancestral population size. Mig indicates the direction of gene flow in the model, with 0 indicating a model with no gene flow. Model support is measured relative to the best fit model in each class (IM9 in (a) and ADM10 in (b)). Likelihood ratio tests (LRT) were calculated as  $2\Delta\ln L$ .

(a) IM (Isolation with migration) models

| Model      | $n(N_e)$ | $N_a$    | Mig            | $\Delta\ln L$ | LRT           | $T$                        | $B$                        | $M$                        |
|------------|----------|----------|----------------|---------------|---------------|----------------------------|----------------------------|----------------------------|
| IM1        | 1        | both     | 0              | -22,877       | n/a           | 3.938                      | n/a                        | n/a                        |
| IM2        | 1        | both     | N->S           | -5,078        | 35,598        | 5.210                      | n/a                        | 0.044                      |
| IM3        | 1        | both     | S->N           | -1,122        | 43,509        | 5.533                      | n/a                        | 0.057                      |
| IM4        | 2        | N        | 0              | -22,740       | 274           | 3.523                      | 1.198                      | n/a                        |
| IM5        | 2        | S        | 0              | -21,298       | 3,157         | 3.808                      | 1.055                      | n/a                        |
| IM6        | 2        | N        | N->S           | -2,855        | 36,885        | 6.417                      | 0.774                      | 0.051                      |
| IM7        | 2        | N        | S->N           | -500          | 44,479        | 6.193                      | 0.872                      | 0.061                      |
| IM8        | 2        | S        | N->S           | -1,757        | 39,081        | 4.573                      | 1.348                      | 0.065                      |
| <b>IM9</b> | <b>2</b> | <b>S</b> | <b>S-&gt;N</b> | <b>0</b>      | <b>45,481</b> | <b>5.137 (4.784-5.489)</b> | <b>1.193 (1.089-1.296)</b> | <b>0.071 (0.045-0.097)</b> |
| IM9 sim    |          |          |                |               |               | 0.299                      | 5.150                      | 1.197                      |

(b) ADM (Instantaneous admixture) models

| Model        | $n(N_e)$ | $N_a$    | Mig            | $\Delta\ln L$ | LRT           | Tadm                       | $T$                        | $B$                        | $f$                        |
|--------------|----------|----------|----------------|---------------|---------------|----------------------------|----------------------------|----------------------------|----------------------------|
| ADM1         | 1        | both     | 0              | -6,349        | 37,230        | n/a                        | 4.969                      | n/a                        | 0.015                      |
| ADM2         | 1        | both     | 0              | -6,349        | 37,230        | n/a                        | 4.969                      | n/a                        | 0.015                      |
| ADM3         | 1        | both     | N->S           | -4,995        | 2,634         | 2.194                      | 6.122                      | n/a                        | 0.296                      |
| ADM4         | 1        | both     | S->N           | -1,110        | 10,478        | 1.970                      | 6.095                      | n/a                        | 0.257                      |
| ADM5         | 2        | N        | 0              | -6,536        | 36,583        | n/a                        | 4.193                      | 1.313                      | 0.014                      |
| ADM6         | 2        | S        | 0              | -5,632        | 35,508        | n/a                        | 4.631                      | 1.152                      | 0.017                      |
| ADM7         | 2        | N        | N->S           | -1,645        | 9,784         | 1.642                      | 5.195                      | 1.329                      | 0.257                      |
| ADM8         | 2        | N        | S->N           | -172          | 10,919        | 2.003                      | 6.872                      | 0.857                      | 0.256                      |
| ADM9         | 2        | S        | N->S           | -1975         | 9,122         | 2.281                      | 7.276                      | 0.767                      | 0.291                      |
| <b>ADM10</b> | <b>2</b> | <b>S</b> | <b>S-&gt;N</b> | <b>0</b>      | <b>11,263</b> | <b>1.656 (1.509-1.802)</b> | <b>5.643 (5.317-5.966)</b> | <b>1.181 (1.093-1.269)</b> | <b>0.239 (0.206-0.272)</b> |
| ADM10 sim    |          |          |                |               |               | 0.302                      | 1.653                      | 5.604                      | 1.184                      |

1070

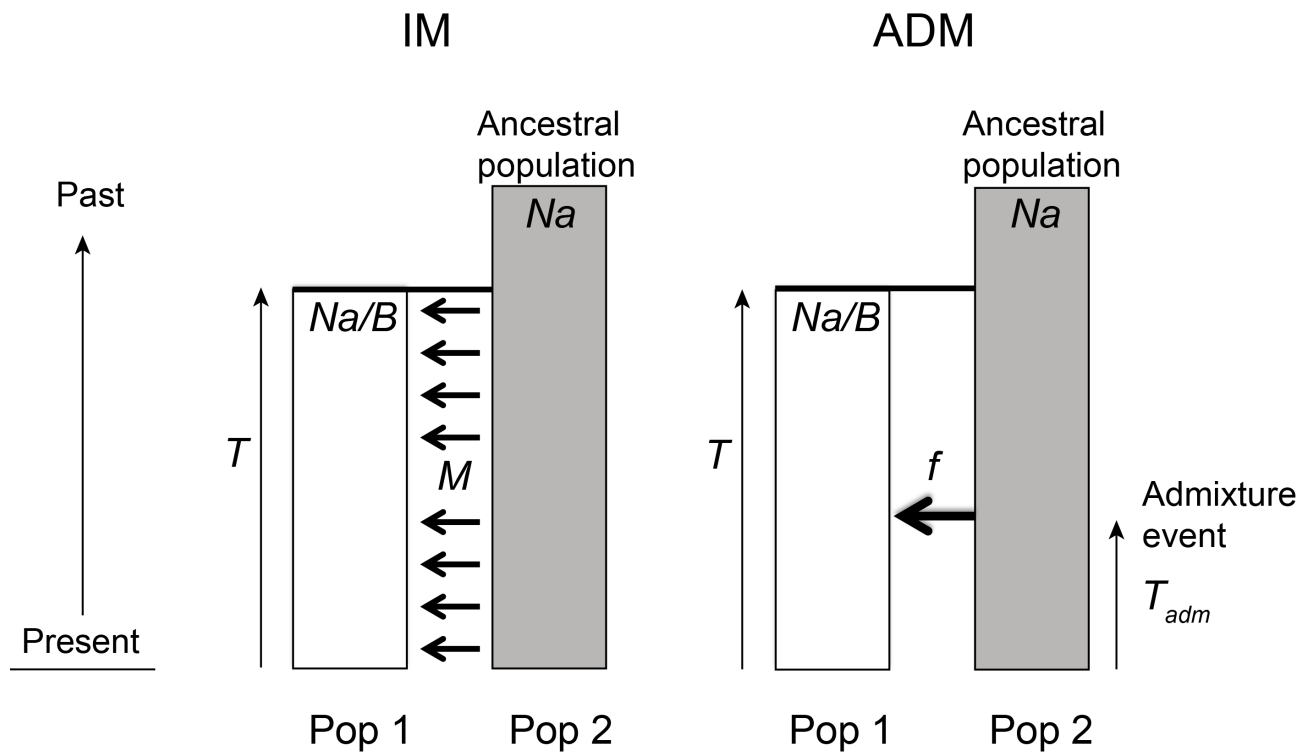

**Figure 1.** The IM (divergence with continuous migration) and ADM (divergence with instantaneous admixture) models of population divergence with gene flow, showing the demographic parameters estimated in our blockwise method analyses. Gene flow can be modelled in either direction.  $N_a$  represents the size of an ancestral population extending back into the past that splits into two daughter populations at time  $T$  (scaled by  $2N_e$ ) generations. One population retains the same population size  $N_a$ , and one is free to have a new population size  $N_a/B$ , where  $B$  is a scaling factor. Post divergence gene flow in the IM model is a continuous process with total  $M$  per generation =  $4N_e * m$ , where  $m$  is the individual migration rate per generation. In the ADM model, gene flow is modelled as an instantaneous admixture event at time  $T_{adm}$  (scaled by  $2N_e$ ) generations ago, at which a fraction  $f$  of lineages in the source population are transferred to the receiving population.

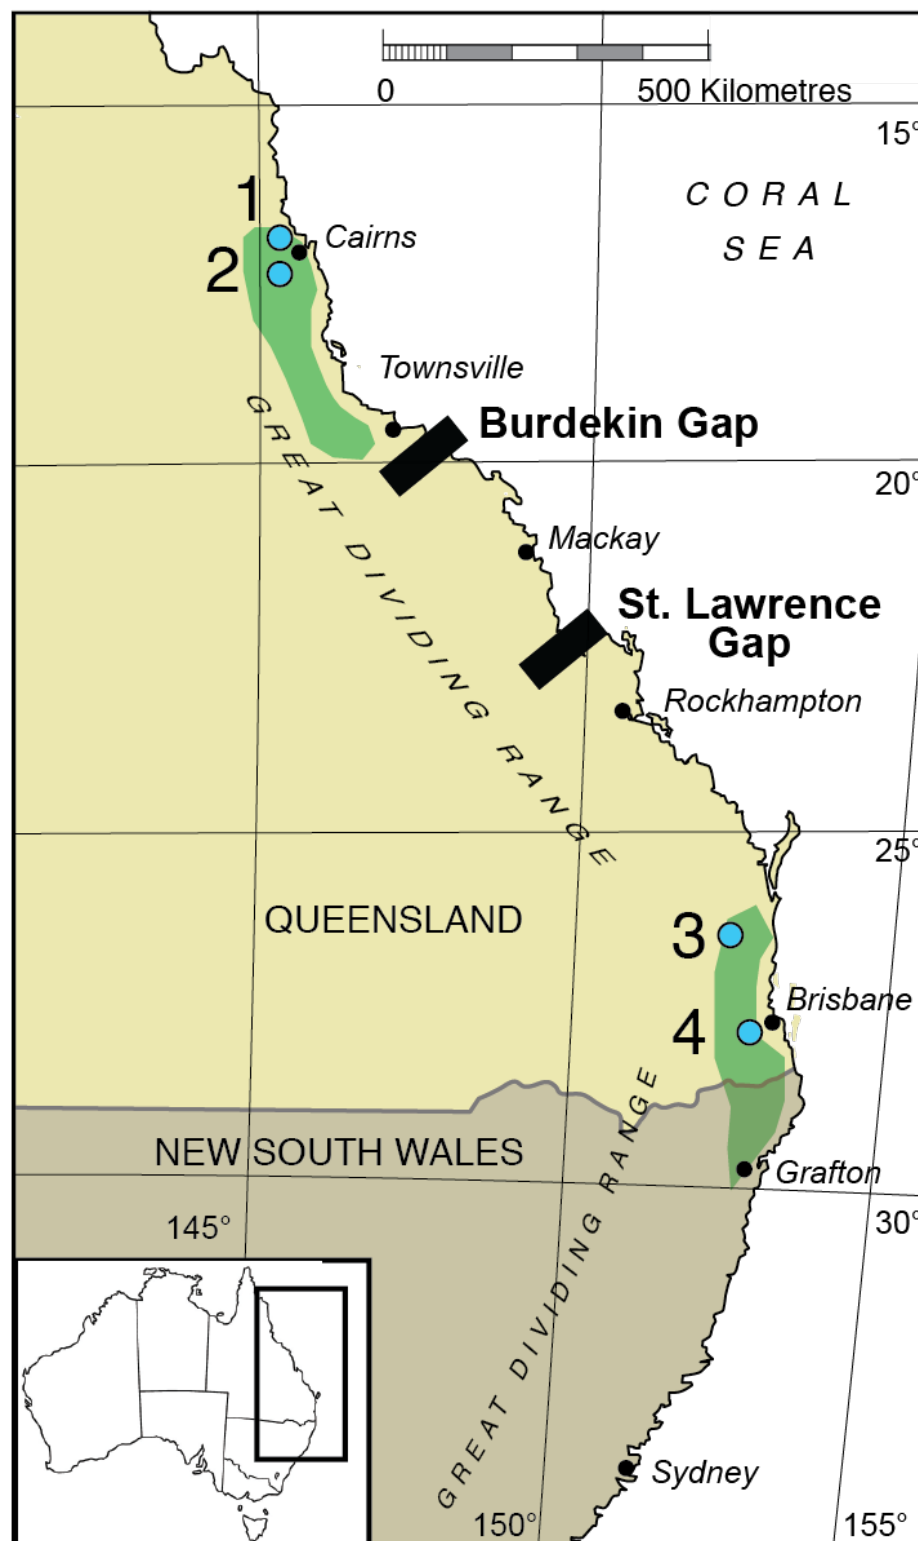

**Figure 2.** Map of the east coast of Australia, showing the distribution of *Ficus watkinsiana* (green) (after Dixon (2003)), the Burdekin and St. Lawrence Gaps (black), and the four sample sites (blue circles). The two Northern sampling sites are Kamerunga (1) and Kairi (2); the two Southern sites are Settlers Rise (3) and Main Range (4). The location of the study region within the whole of Australia is shown by the box in the inset at bottom left.

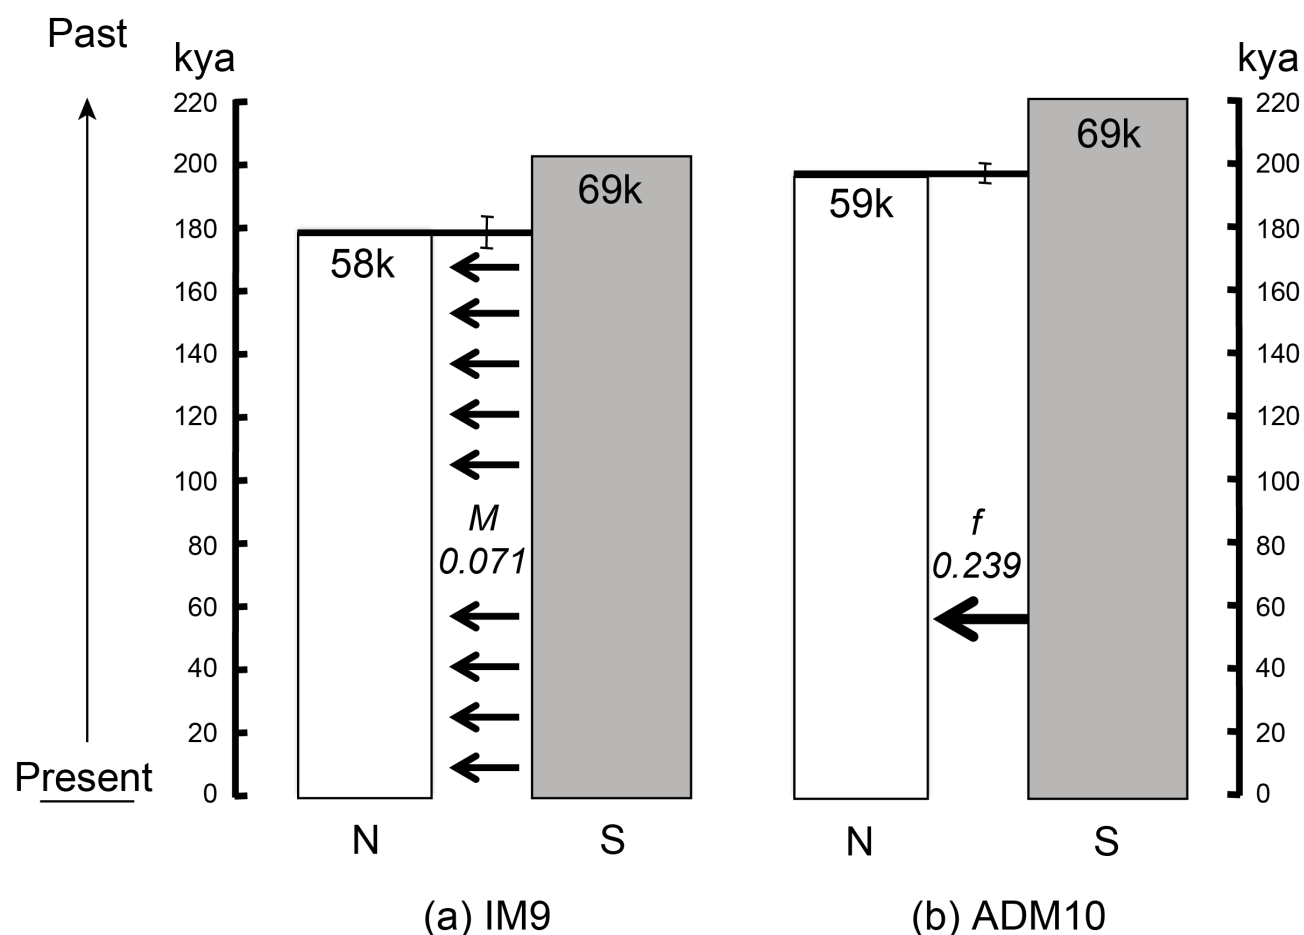

**Figure 3.** The best supported models under (a) IM and (b) ADM scenarios for *Pleistodontes nigriventris*. Bars joining the populations at divergence are the 95% confidence intervals for the divergence time. The time is measured in thousands of years. The population widths are scaled according to their population size estimates (given in thousands). 95% confidence intervals for other parameters are given in Table 1.

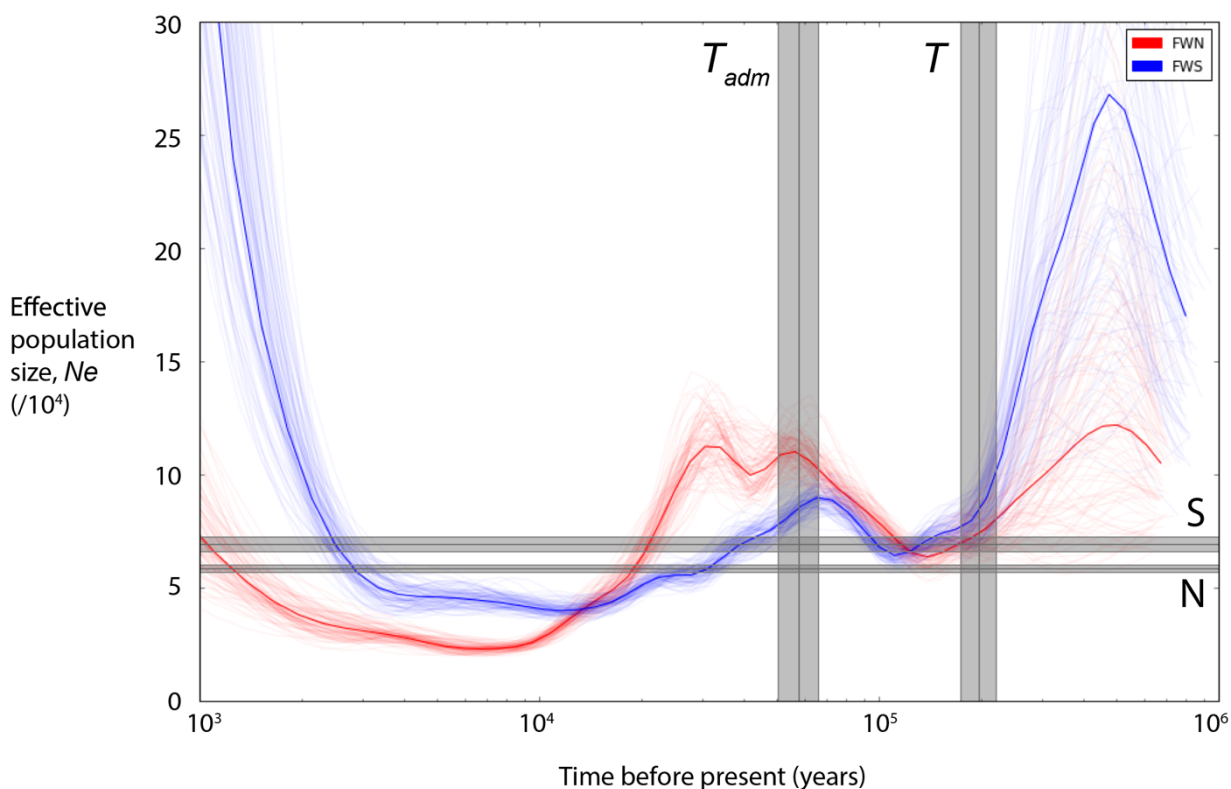

**Figure 4.** Population size trajectories for the Northern (red) and Southern (blue) populations inferred using PSMC. Heavy red and blue lines represent estimates for each population, thin lines show individual bootstrap replicates. Maximum composite likelihood estimate (MCLE) for the population sizes for the North and South populations and the dates of admixture ( $T_{adm}$ ) and population divergence ( $T$ ) under the model that gives the best fit to the blockwise data (ADM10) (and their 95% confidence intervals) are overlaid in grey.
